# Supplementary figures and images for: Ogt Demonstrated Conspicuous Clinical Significance in Cancers, from Pan-Cancer to Small-Cell Lung Cancer
Source: Hindawi journal article supplement (doi:10.1155/2022/2010341), 2022-03-21

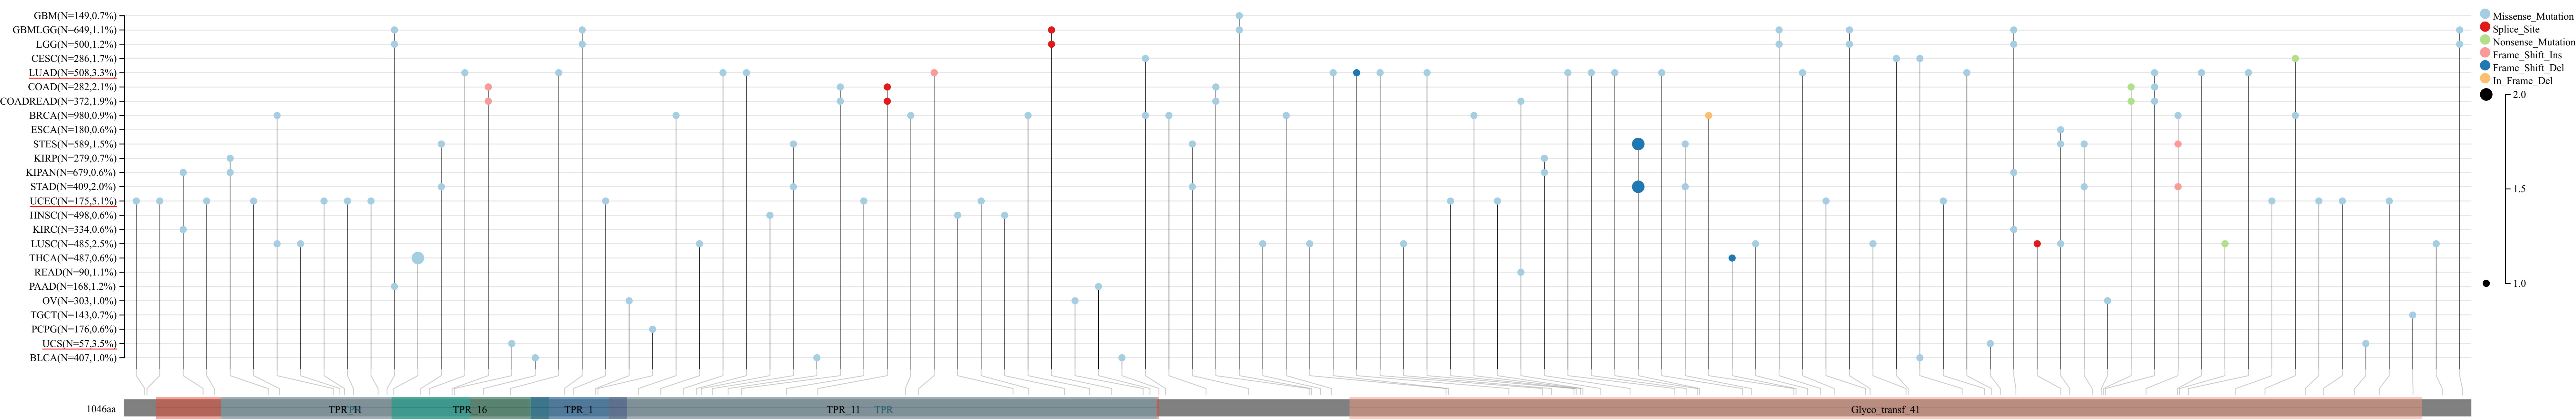

Supplement: f1 [file 2010341.f1.zip]

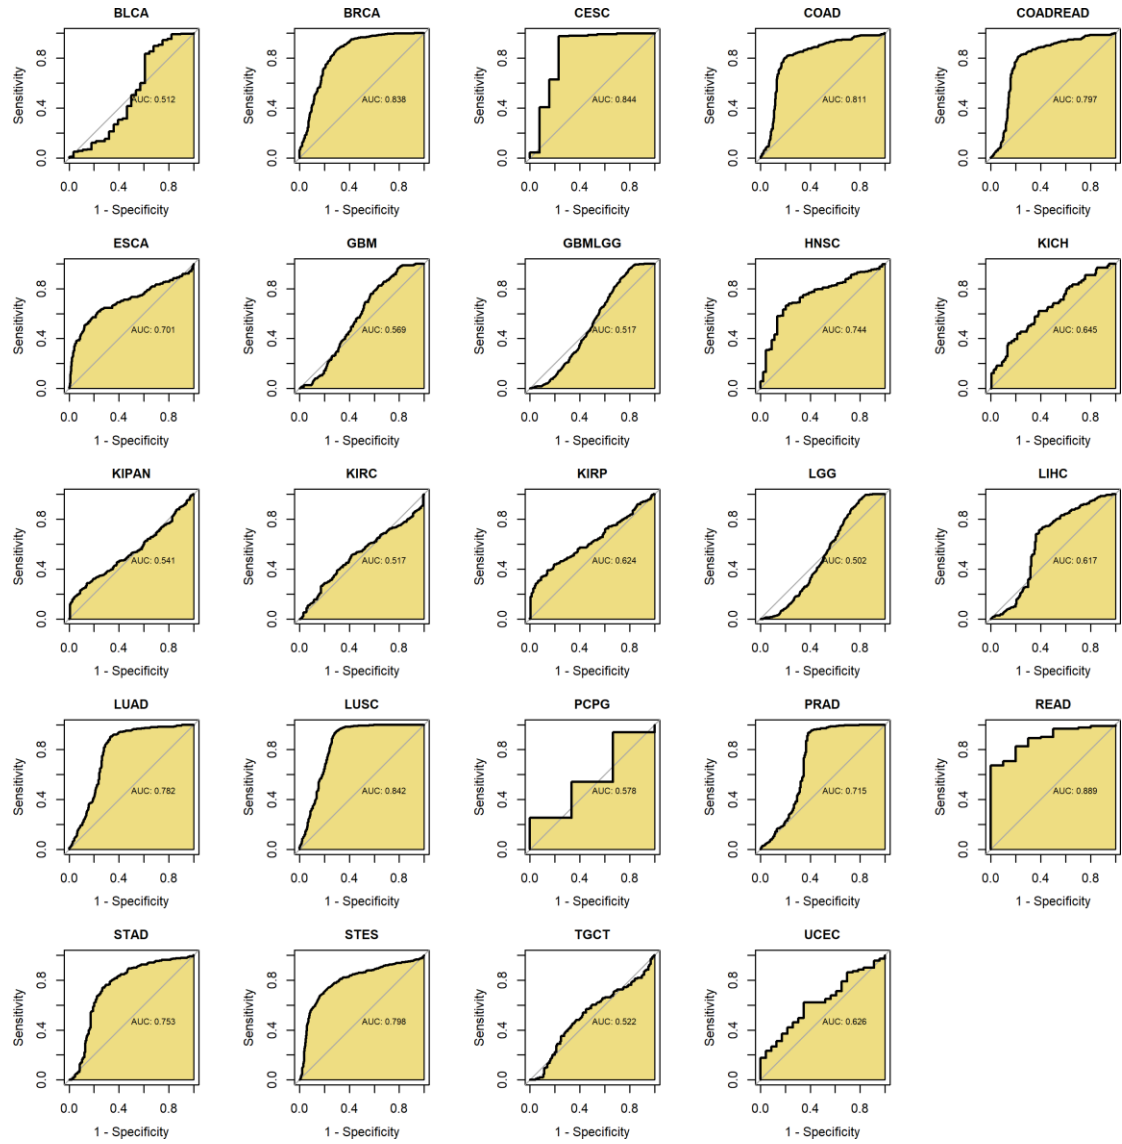

Supplement: f1 [file 2010341.f1.zip]

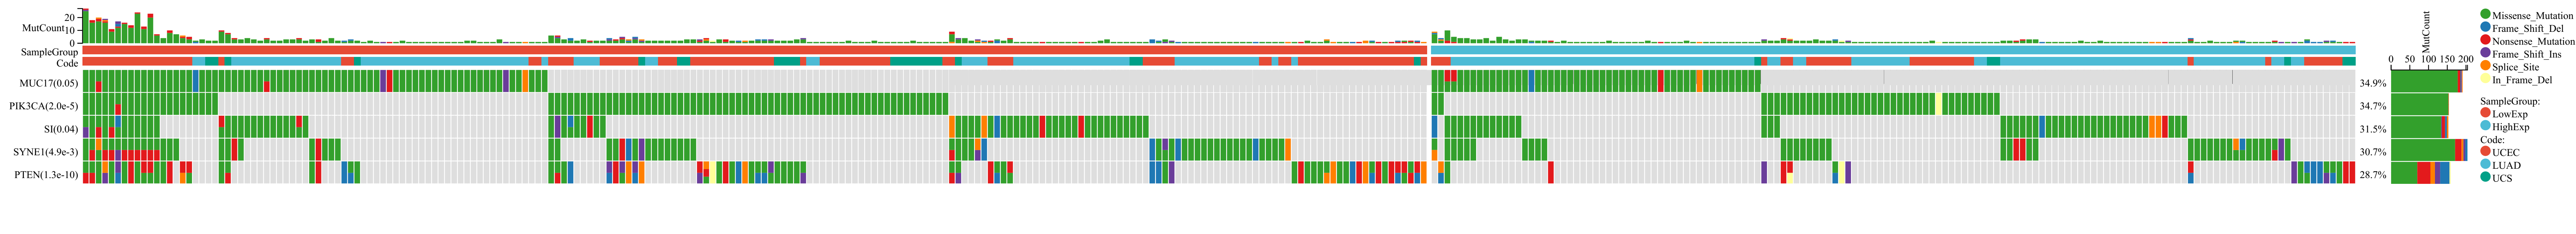

Supplement: f1 [file 2010341.f1.zip]

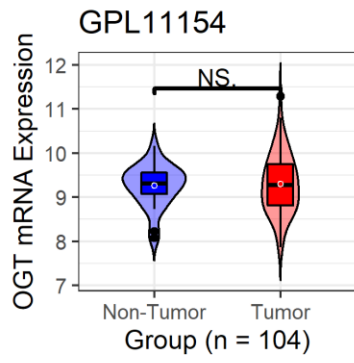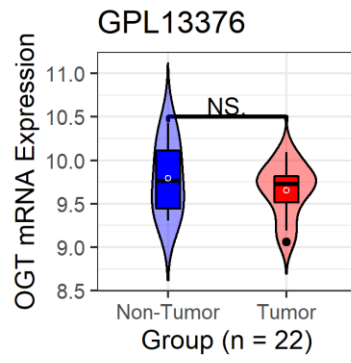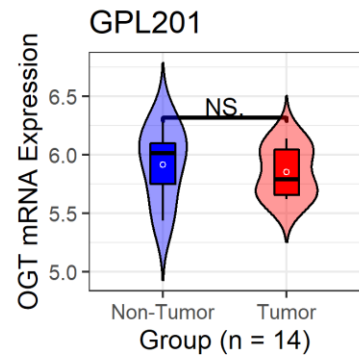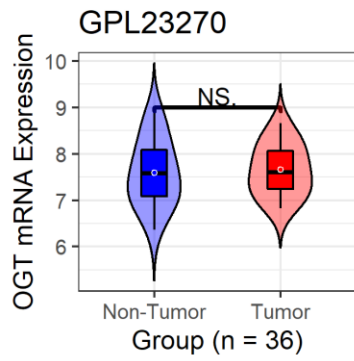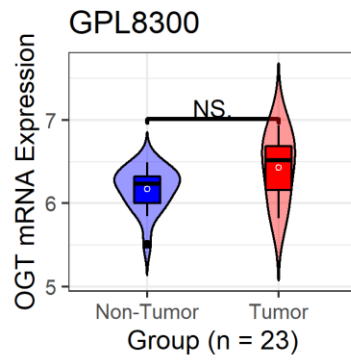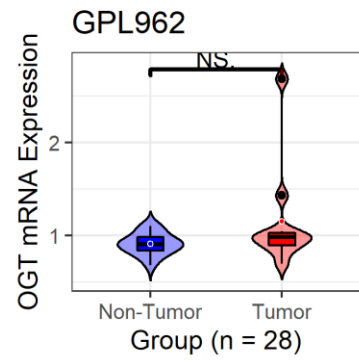

Supplement: f1 [file 2010341.f1.zip]

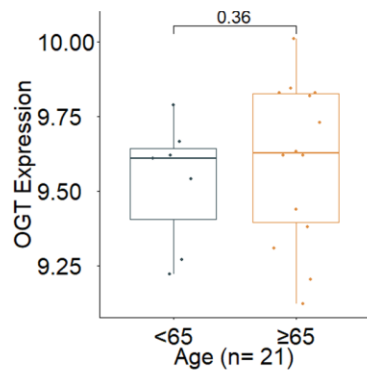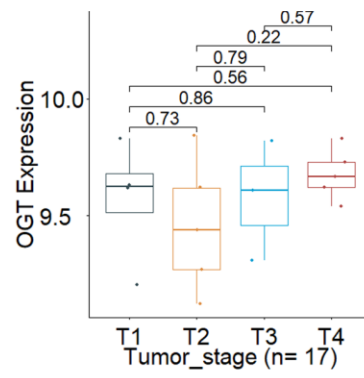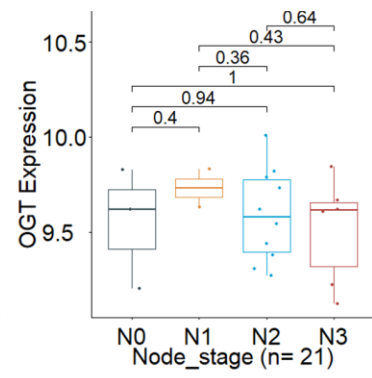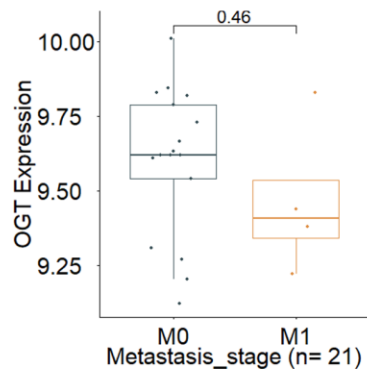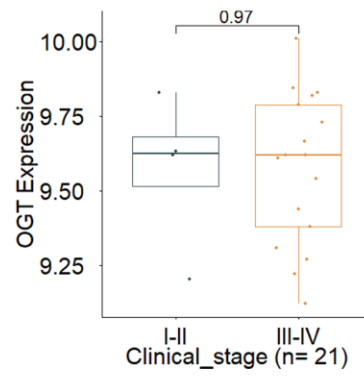

Supplement: f1 [file 2010341.f1.zip]

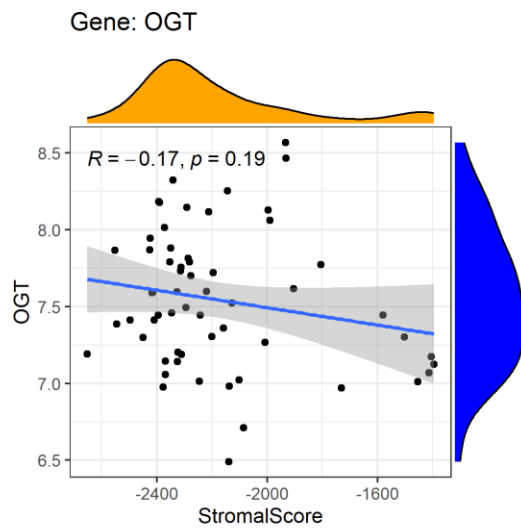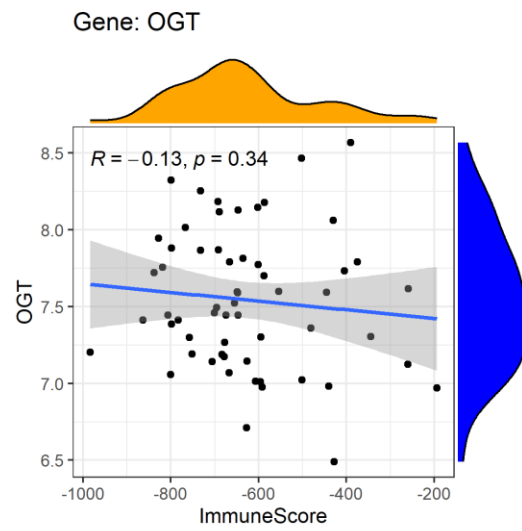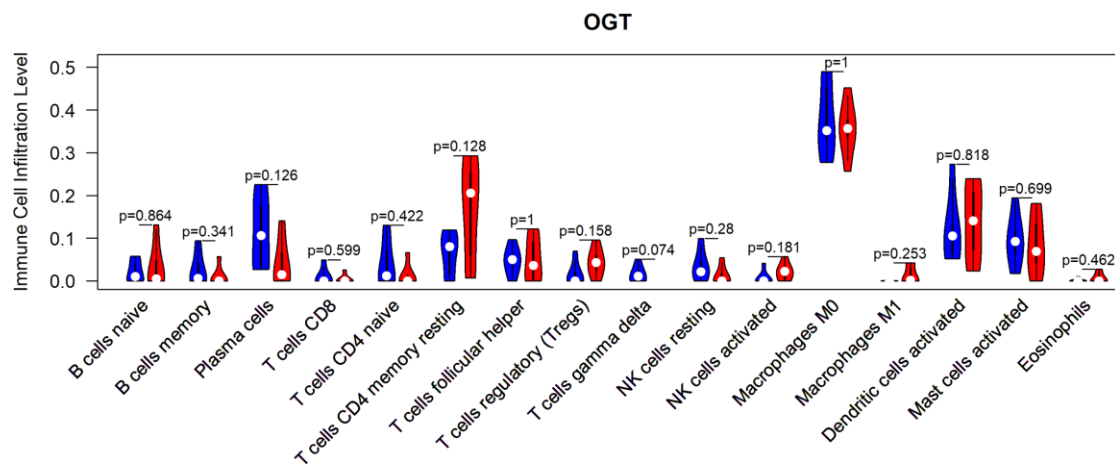

Supplement: f1 [file 2010341.f1.zip]

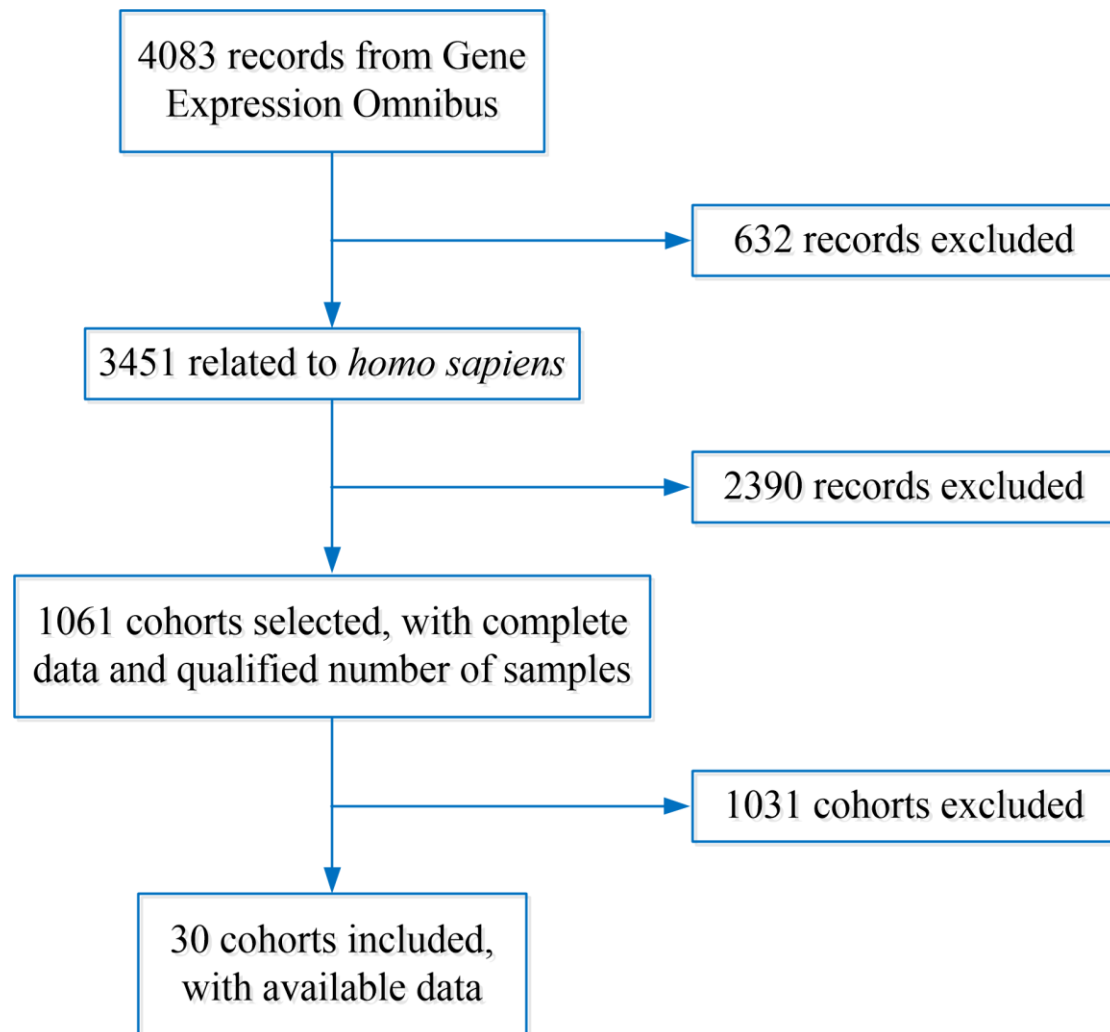

Supplement: f1 [file 2010341.f1.zip]

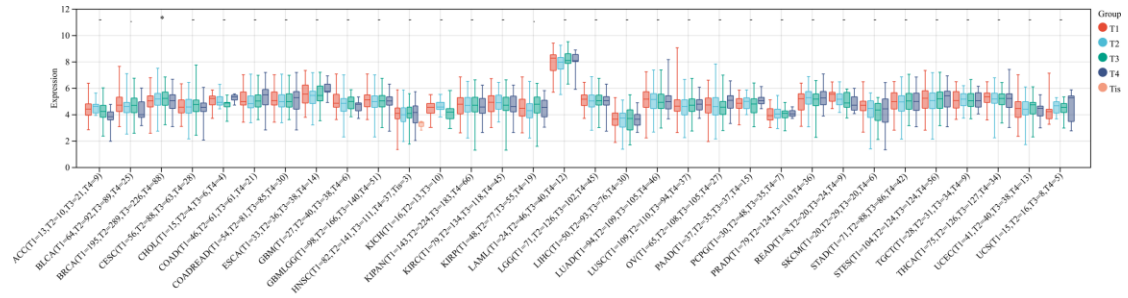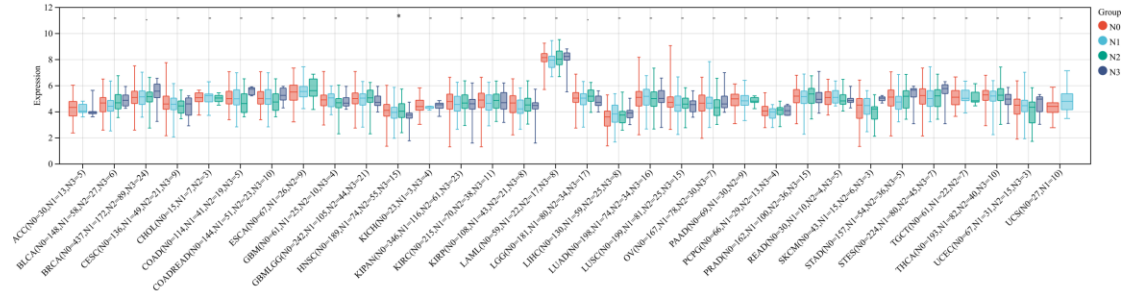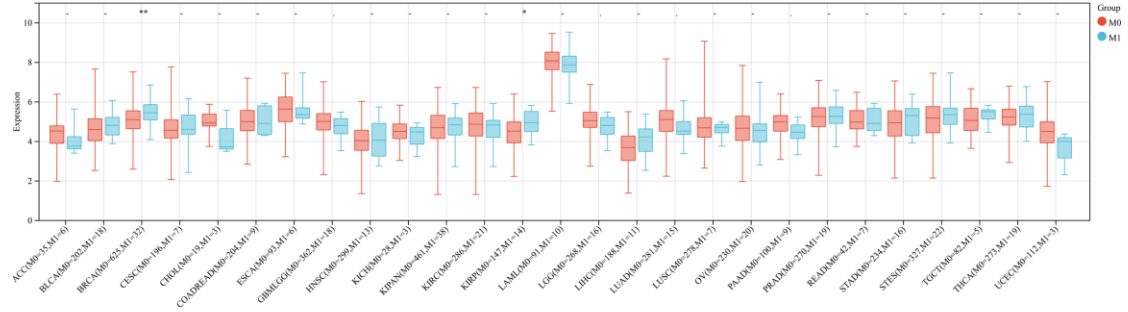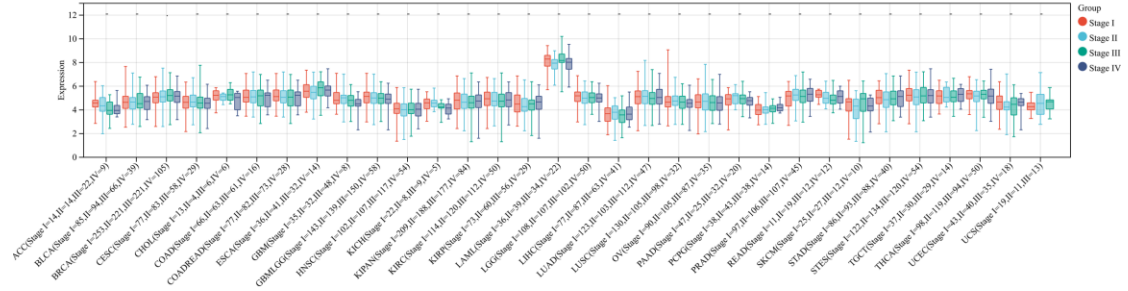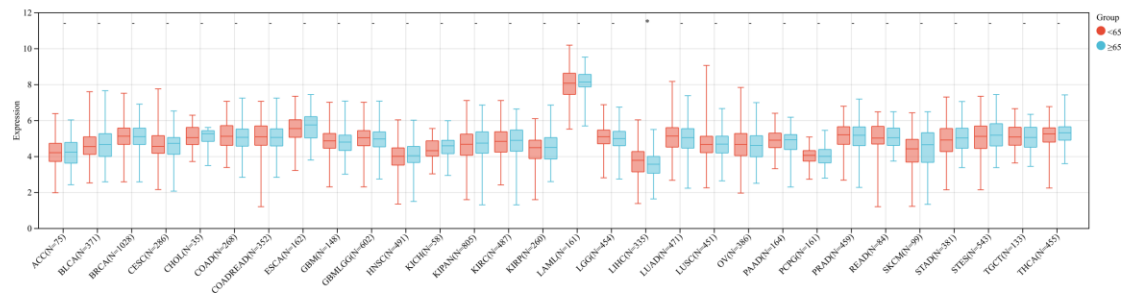

Supplement: f1 [file 2010341.f1.zip]
